# Supplementary material for: Population Genomics and Phylogeography of a Clonal Bryophyte With Spatially Separated Sexes and Extreme Sex Ratios
Source: PubMed Central journal article supplement (PMC7226906; doi:10.3389/fpls.2020.00495), 2020-05-08

**A**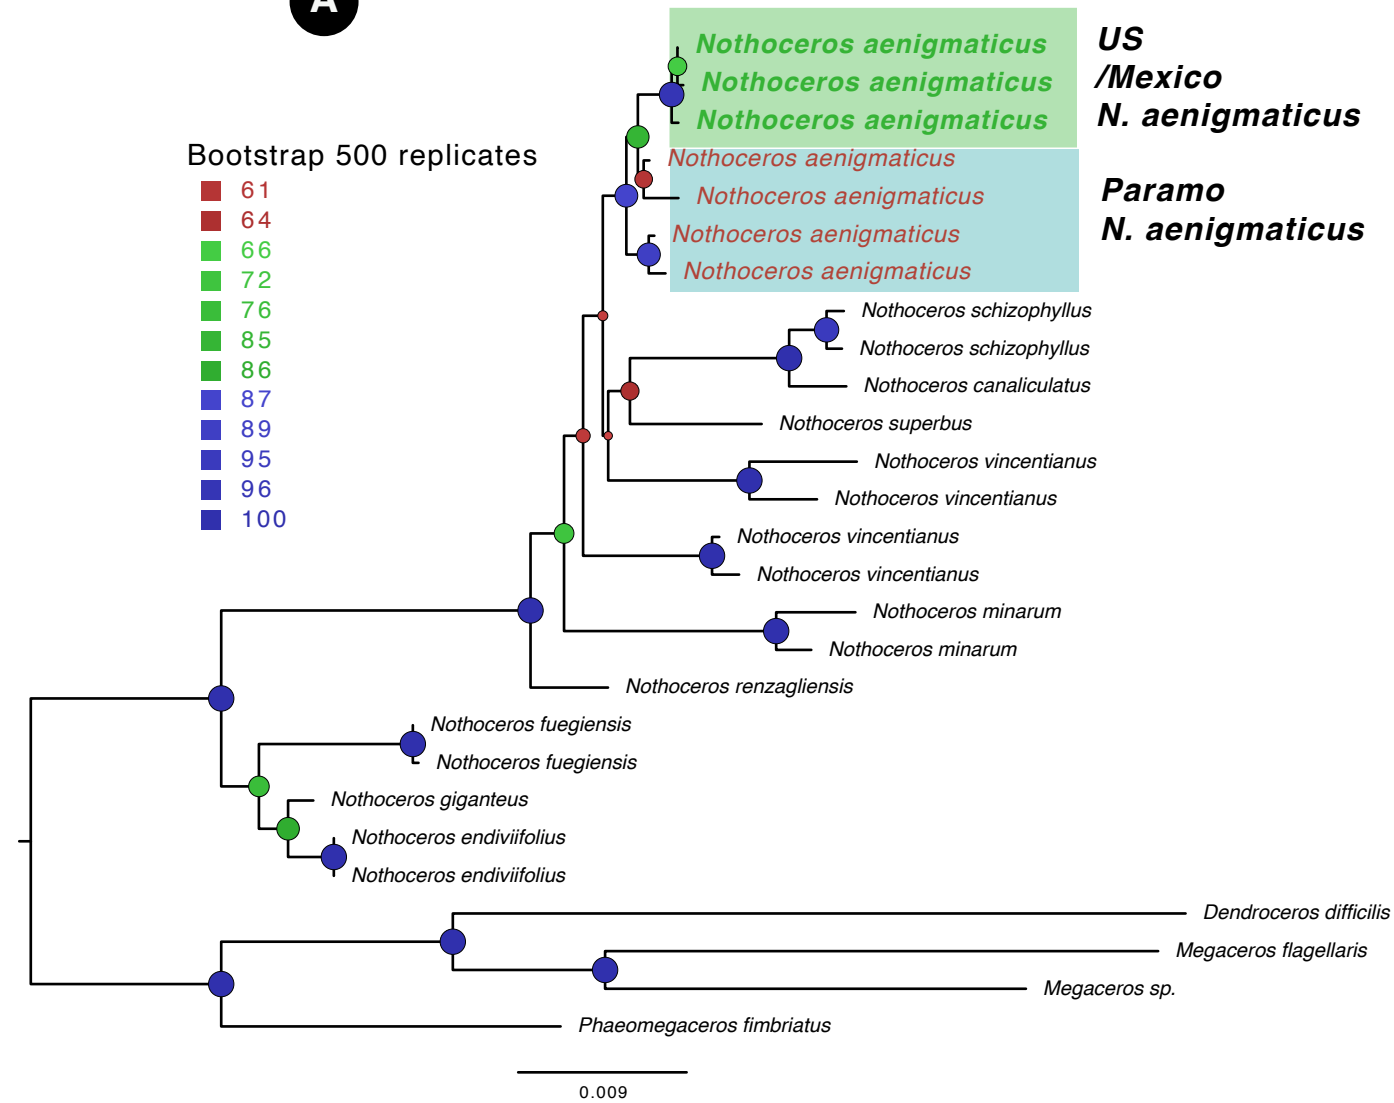**B**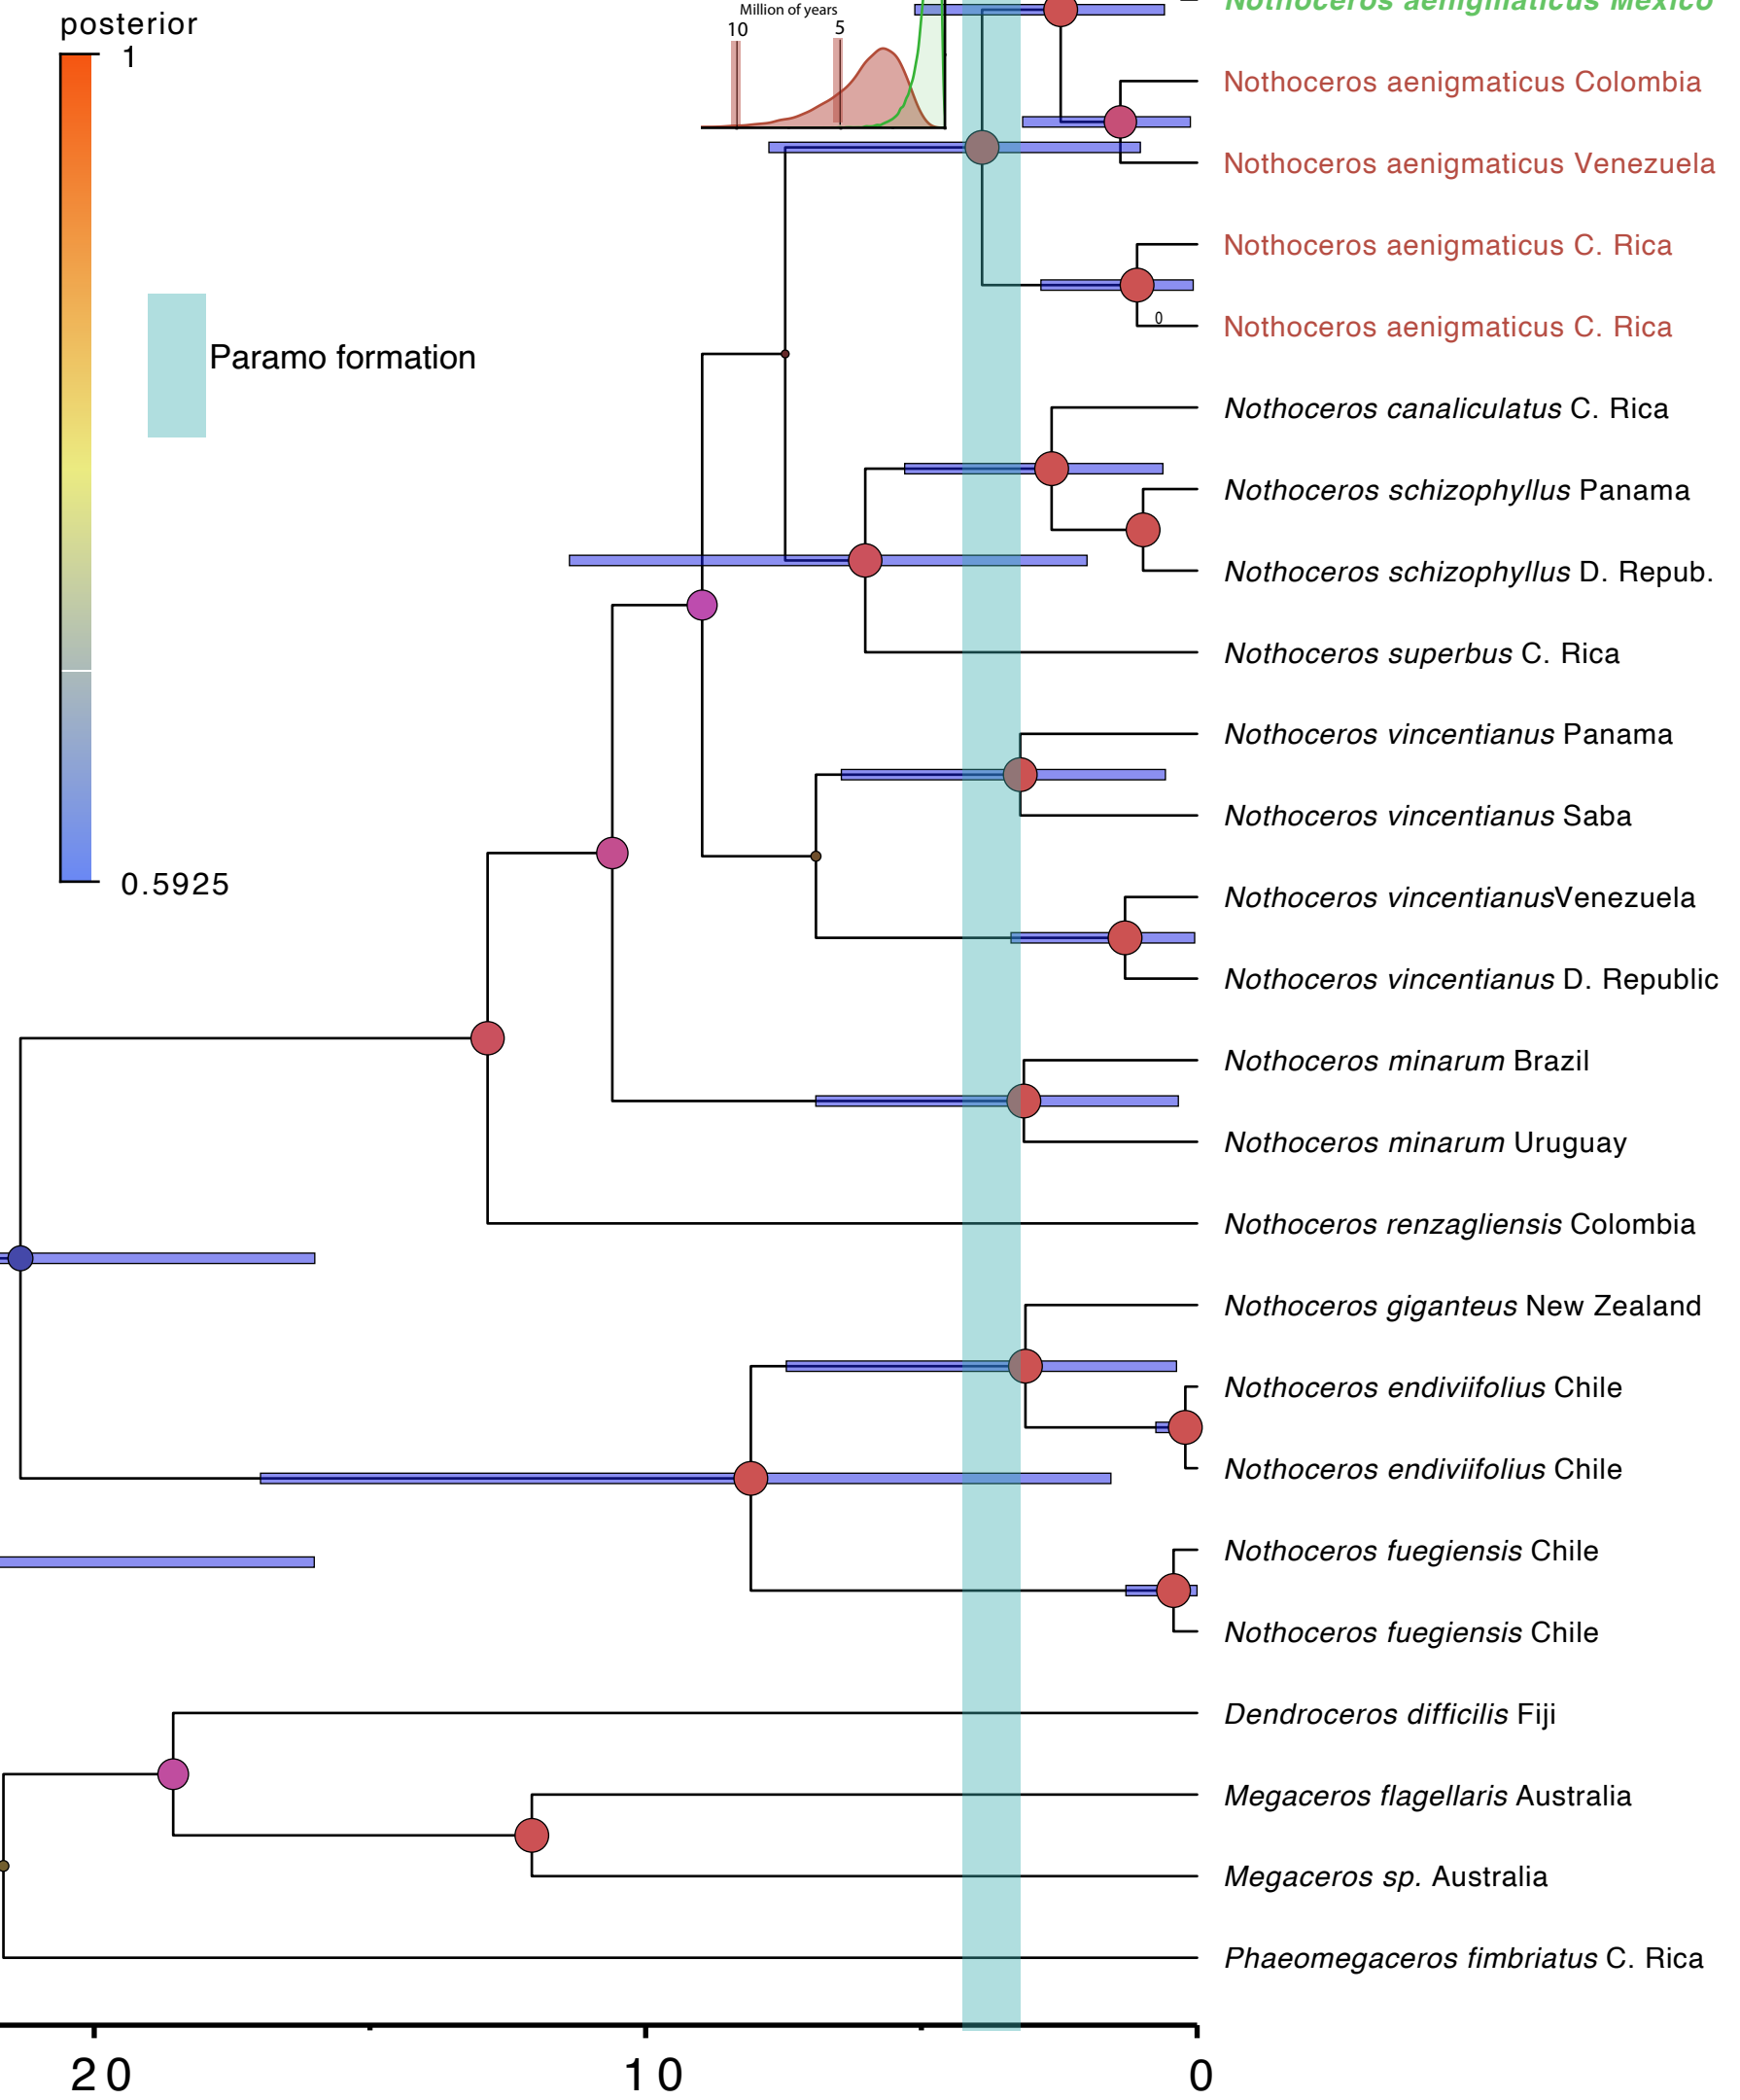

Supplement: Image_1.pdf [file Image_1.pdf]
